# Supplementary material for: Gamma-induced one-step synthesis of reduced graphene oxide–silver nanoparticles with enhanced properties
Source: Royal Society of Chemistry journal article supplement (doi:10.1039/d4qm01057d), 2025-01-01
Supplement: d4qm01057d1.pdf [file d4qm01057d1.pdf]

## Gamma-Induced One-Step Synthesis of Reduced Graphene Oxide-Silver Nanoparticles with Enhanced Properties

Souad Abou Zeid,<sup>a\*</sup> Liran Hu,<sup>a</sup> Rasta Ghasemi,<sup>b</sup> Matthieu Gervais,<sup>c</sup> Jaspreet Kaur Randhawa,<sup>d</sup> Prem Felix Siril<sup>d</sup>

---

<sup>a</sup> Institut de Chimie Physique, ICP, UMR 8000, CNRS, Université Paris-Saclay, bâtiment 349, Campus d'Orsay, 15 avenue Jean Perrin, 91405 Orsay Cedex, France.

<sup>b</sup> Institut d'Alembert, IDA, ENS Paris-Saclay, 4 avenue des sciences, 91190 Gif-sur-Yvette, France.

<sup>c</sup> Laboratoire Procédés et Ingénierie en Mécanique et Matériaux, PIMM, Arts et Métiers ParisTech, UMR 8006, CNRS, CNAM, HESAM université, 151 boulevard de l'hôpital, 75013 Paris, France.

<sup>d</sup> School of Chemical Sciences, Indian Institute of Technology Mandi, Mandi, Himachal Pradesh-175005, India.

<sup>e</sup> Département Chimie Vivant Santé, EPN 7, Conservatoire National des Arts et Métiers, CNAM, 292 rue Saint-Martin, 75141 Paris Cedex 03, France.

<sup>f</sup> \*Corresponding author. Institut de Chimie Physique, ICP, UMR 8000, CNRS, Université Paris-Saclay, bâtiment 349, Campus d'Orsay, 15 avenue Jean Perrin, 91405 Orsay Cedex, France. E-mail address: samy.remita@universite-paris-saclay.fr (S. Remita), souadabouzeid321@gmail.com (S. Abou Zeid).

---

and Samy Remita<sup>a,e\*</sup>

## Supporting information

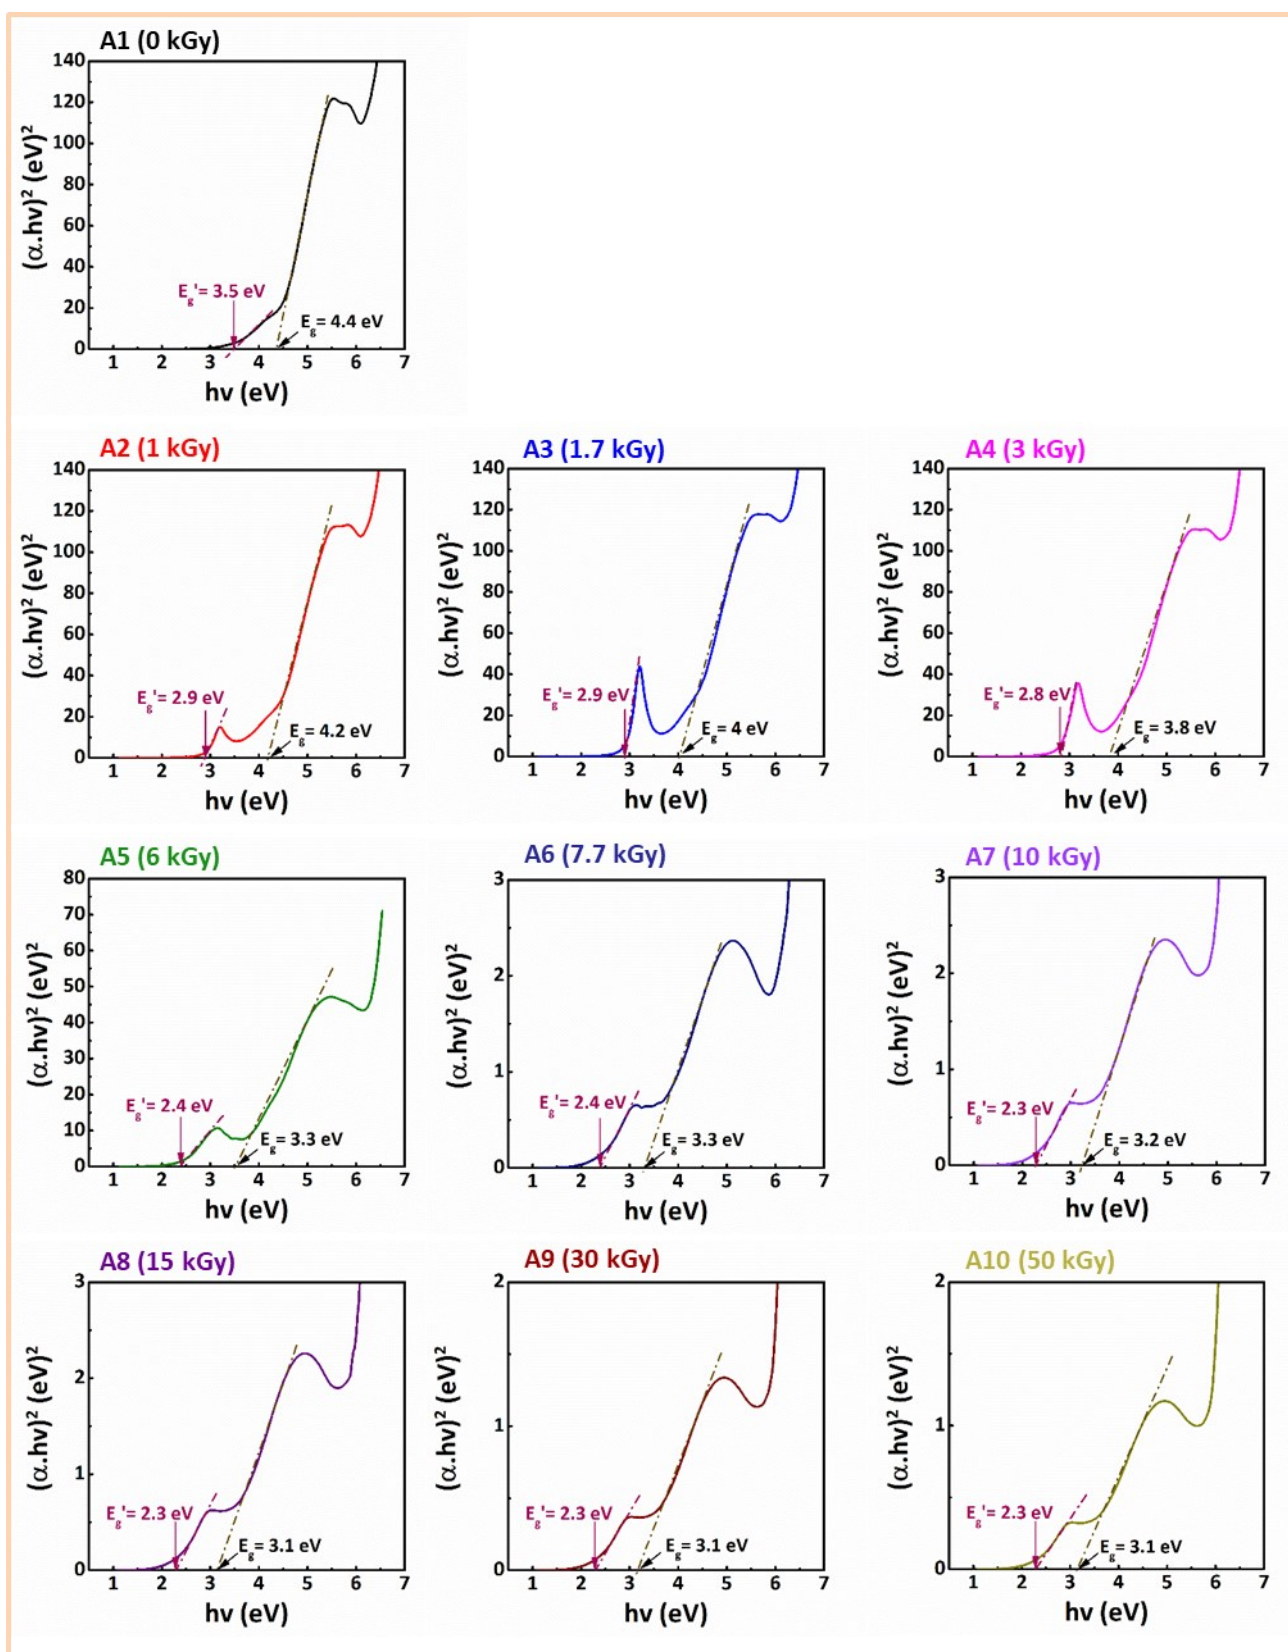

**Fig. S1** Tauc plot for the determination of the energy gap from UV-Vis spectra of Series A samples ([OG] = 0.2 g L<sup>-1</sup>, [IPA] = 0.2 mol L<sup>-1</sup>, [Ag<sup>+</sup>] = 10<sup>-3</sup> mol L<sup>-1</sup>) irradiated at doses ranging from 0 kGy to 50 kGy. The intersection of the linear fit with the x-axis represents the energy gap for each sample.  $E_g$  corresponds to the bandgap GO and rGO, while  $E'_g$  refers to the bandgap of Ag NPs.

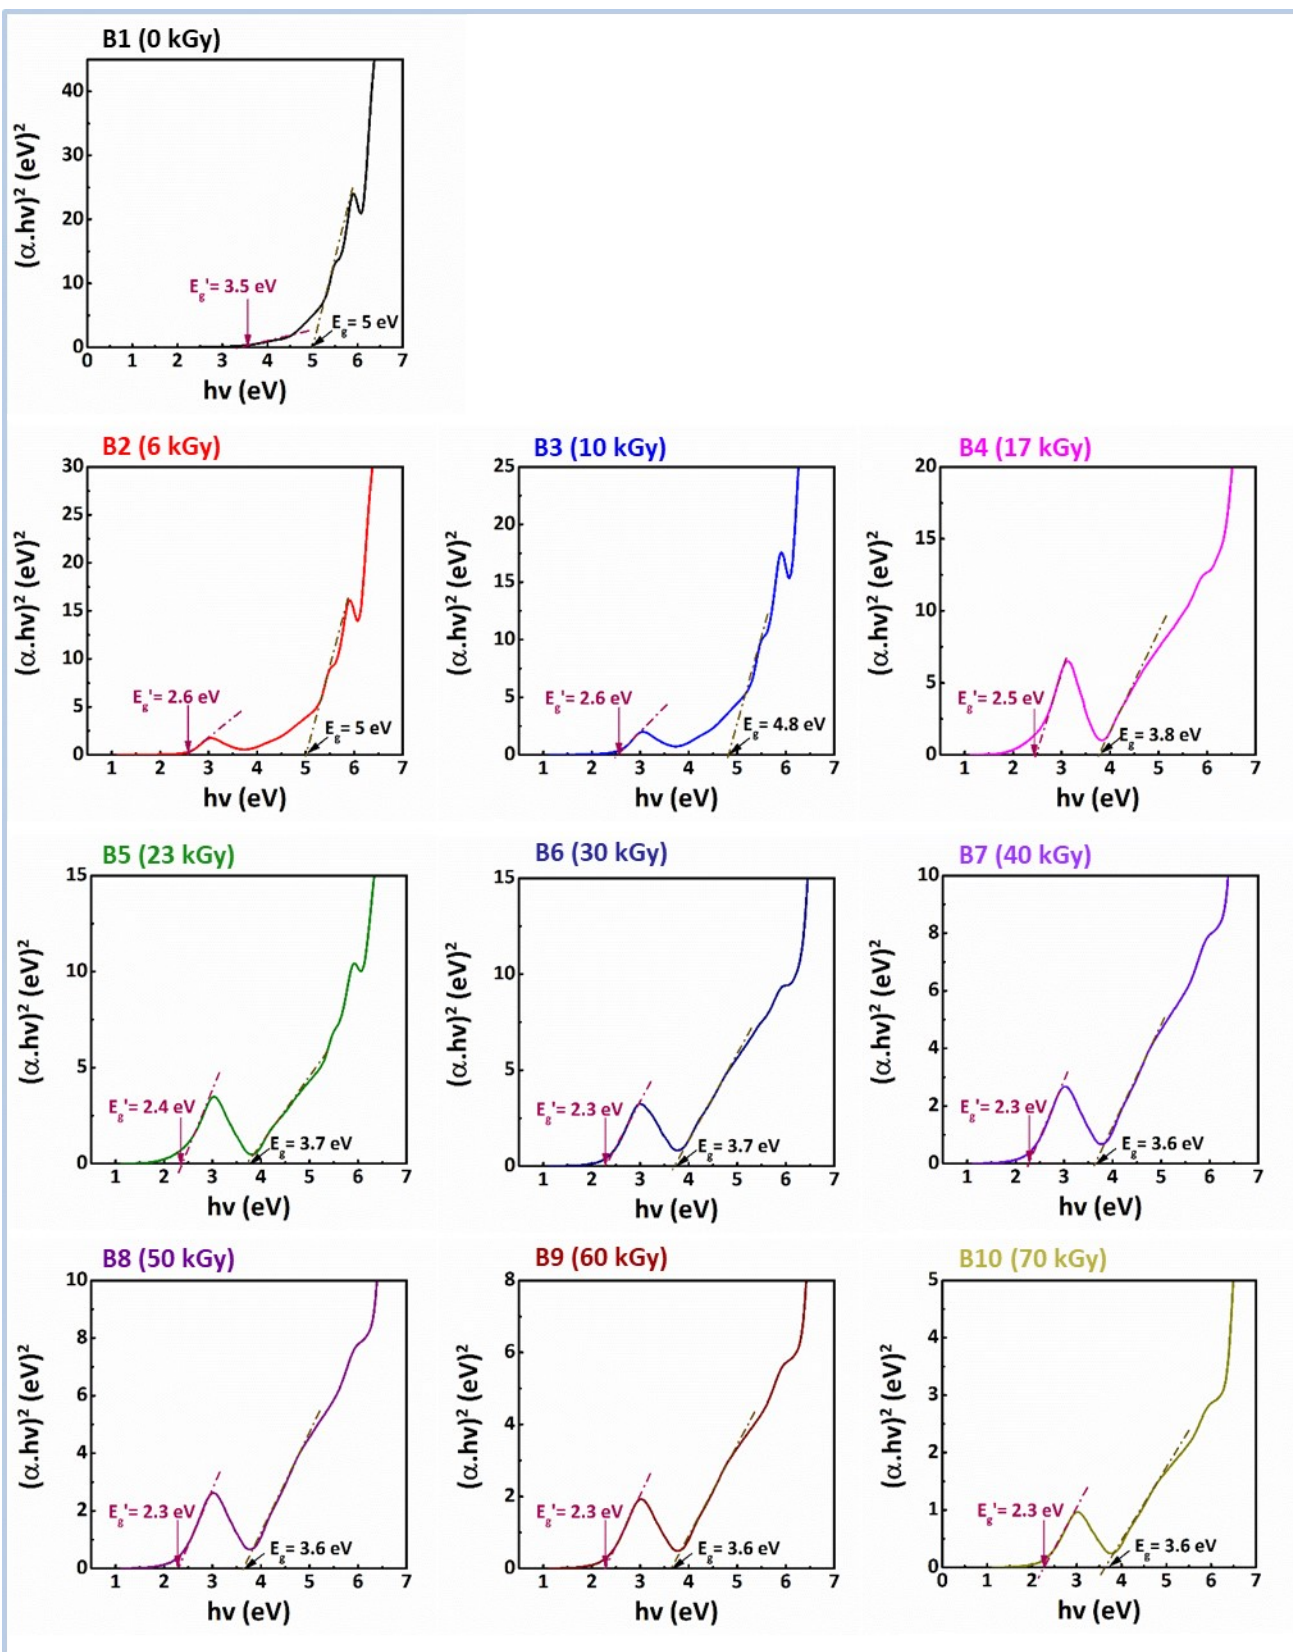

Fig. S2 Tauc plot for the determination of the energy gap ( $E_g$ ) from UV-Vis spectra of Series B samples ( $[OG] = 0.2 \text{ g L}^{-1}$ ,  $[IPA] = 0.2 \text{ mol L}^{-1}$ ,  $[Ag^+] = 10^{-2} \text{ mol L}^{-1}$ ) irradiated at doses ranging from 0 kGy to 70 kGy. The intersection of the linear fit with the x-axis represents the energy gap for each sample.  $E_g$  corresponds to the bandgap GO and rGO, while  $E'_g$  refers to the bandgap of Ag NPs.

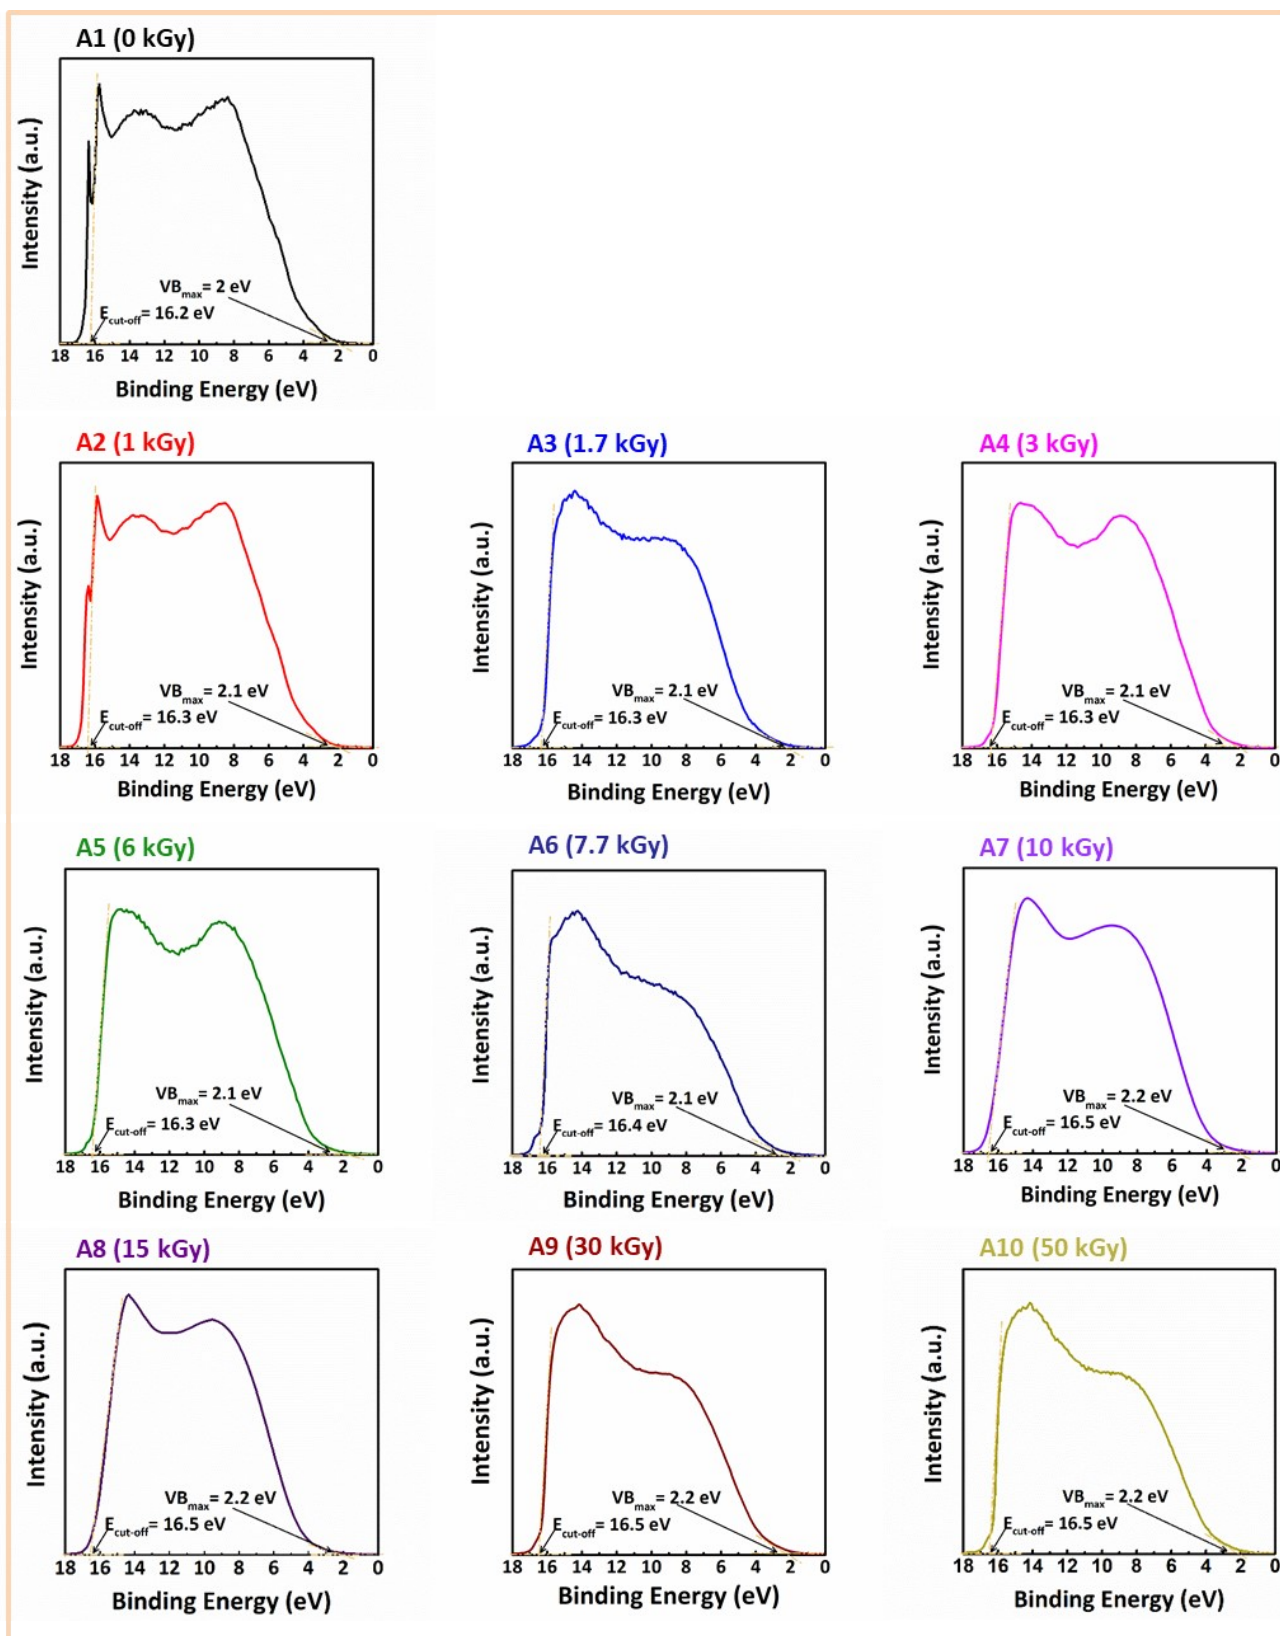

Fig. S3 Evolution of the UPS spectrum obtained using Hel for all samples in Series A containing GO (0.2 g L<sup>-1</sup>), Ag<sup>+</sup> (10<sup>-3</sup> mol L<sup>-1</sup>), and IPA (0.2 mol L<sup>-1</sup>), both unirradiated and irradiated at various doses.

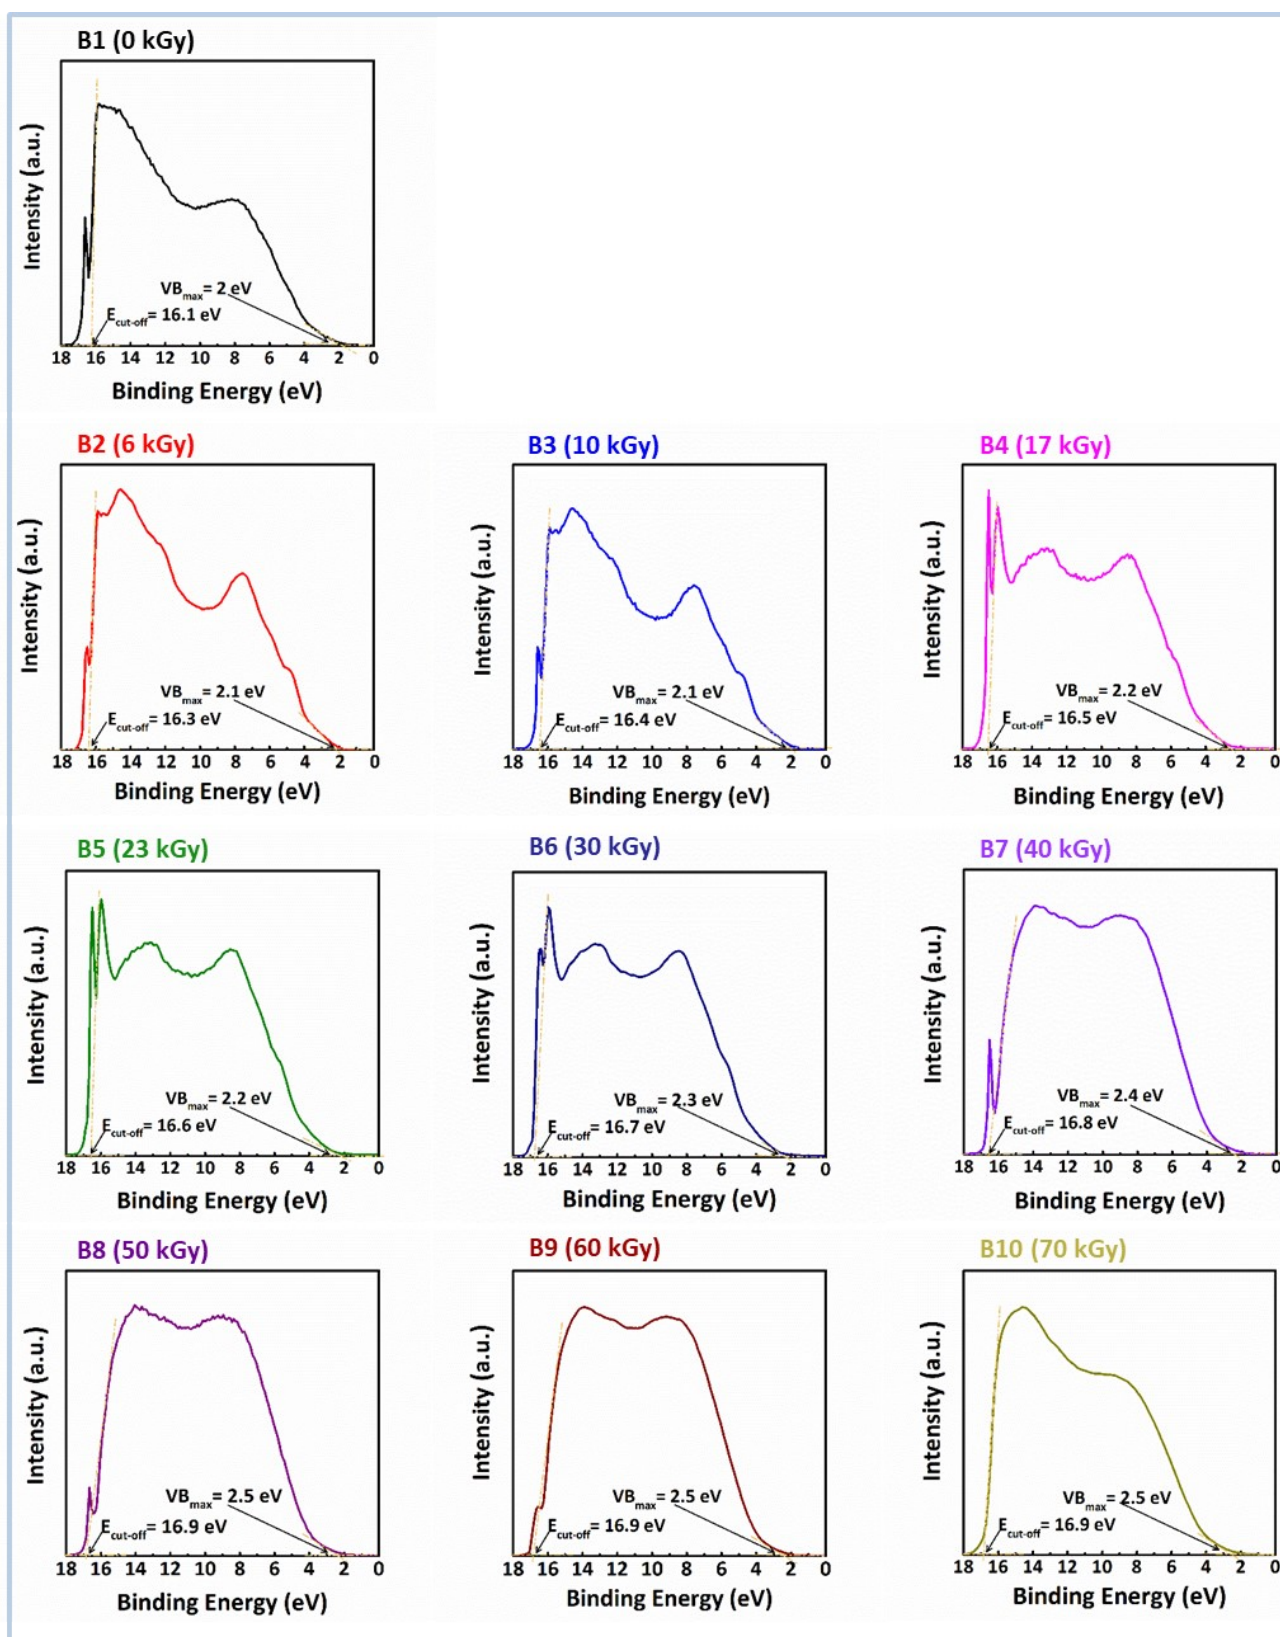

Fig. S4 Evolution of the UPS spectrum obtained using HeI for all samples in Series B containing GO ( $0.2 \text{ g L}^{-1}$ ),  $\text{Ag}^+$  ( $10^{-2} \text{ mol L}^{-1}$ ), and IPA ( $0.2 \text{ mol L}^{-1}$ ), both unirradiated and irradiated at various doses.

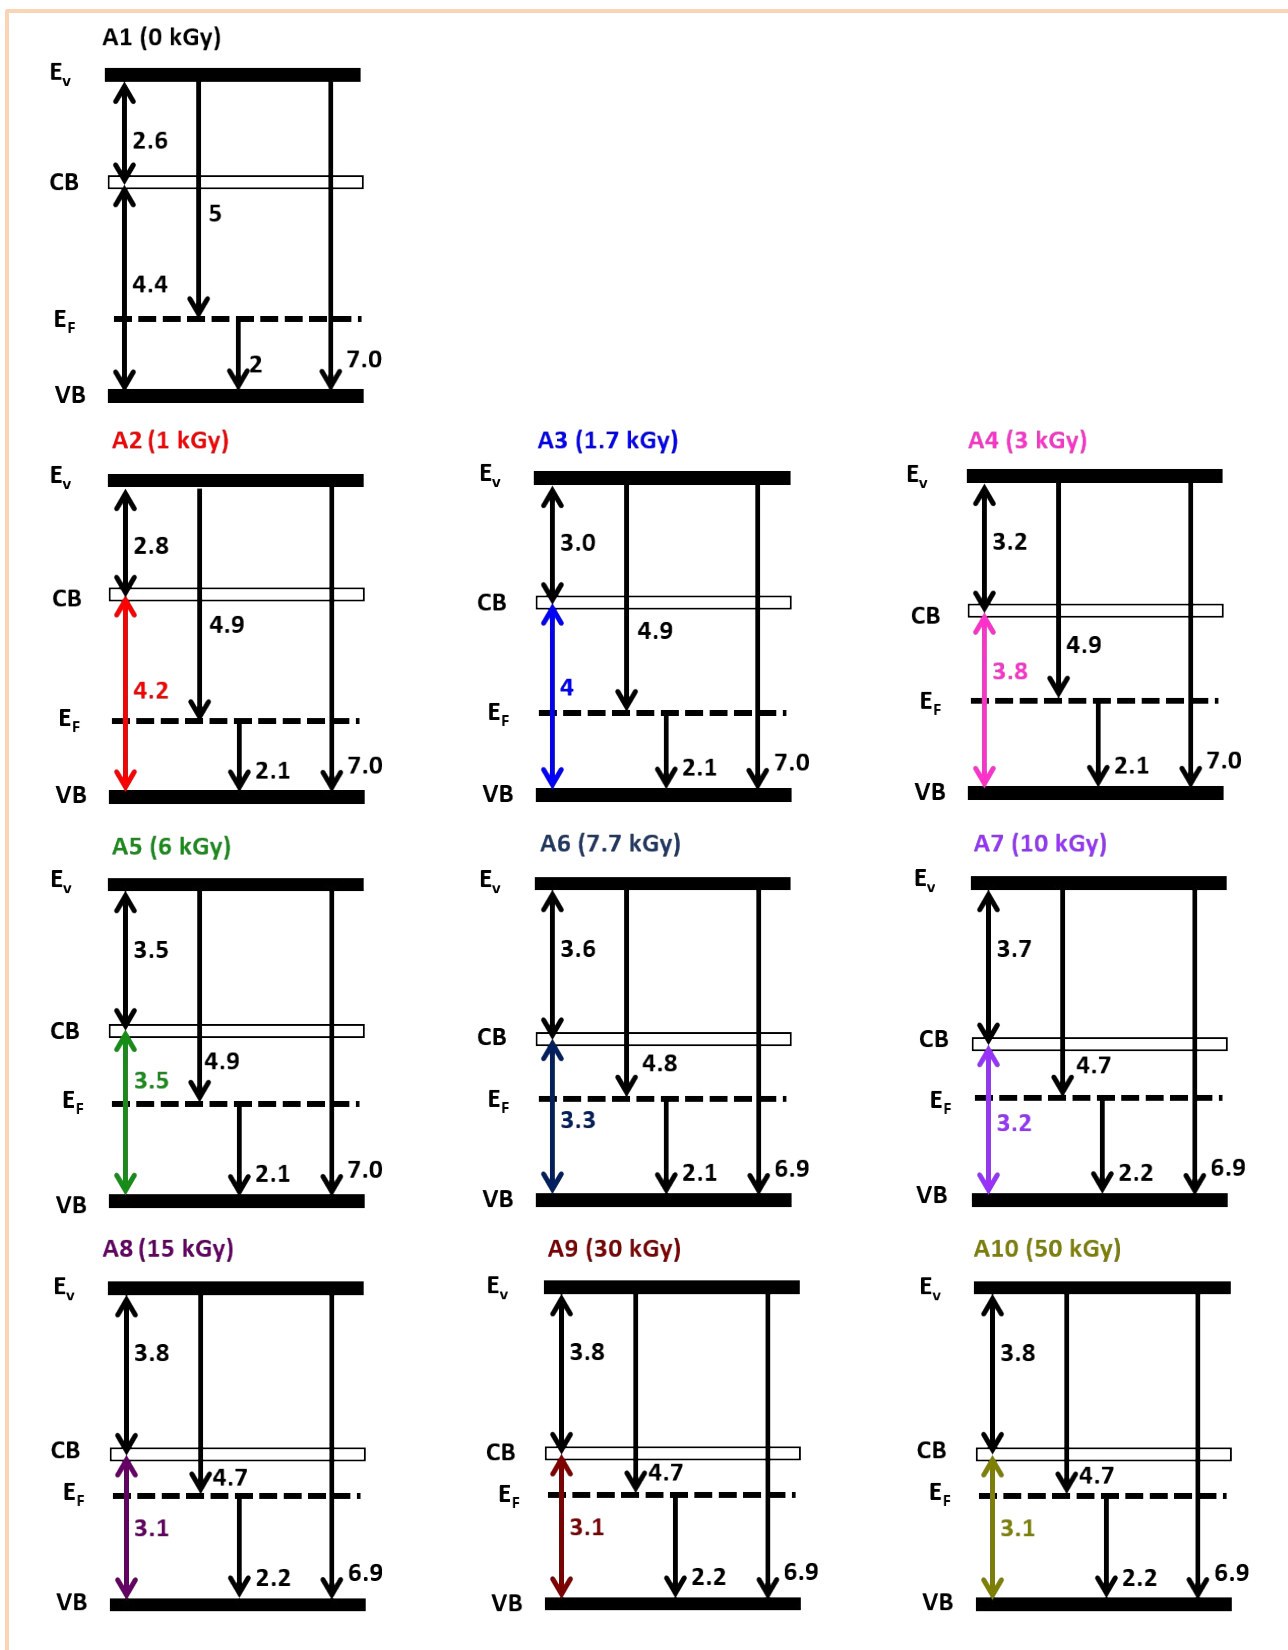

Fig. S5 Band diagrams illustrating the evolution of the band structure of GO (0.2 g L<sup>-1</sup>)-Ag<sup>+</sup> (10<sup>-3</sup> mol L<sup>-1</sup>) in the presence of isopropanol (0.2 mol L<sup>-1</sup>) as a function of absorbed dose (Series A).

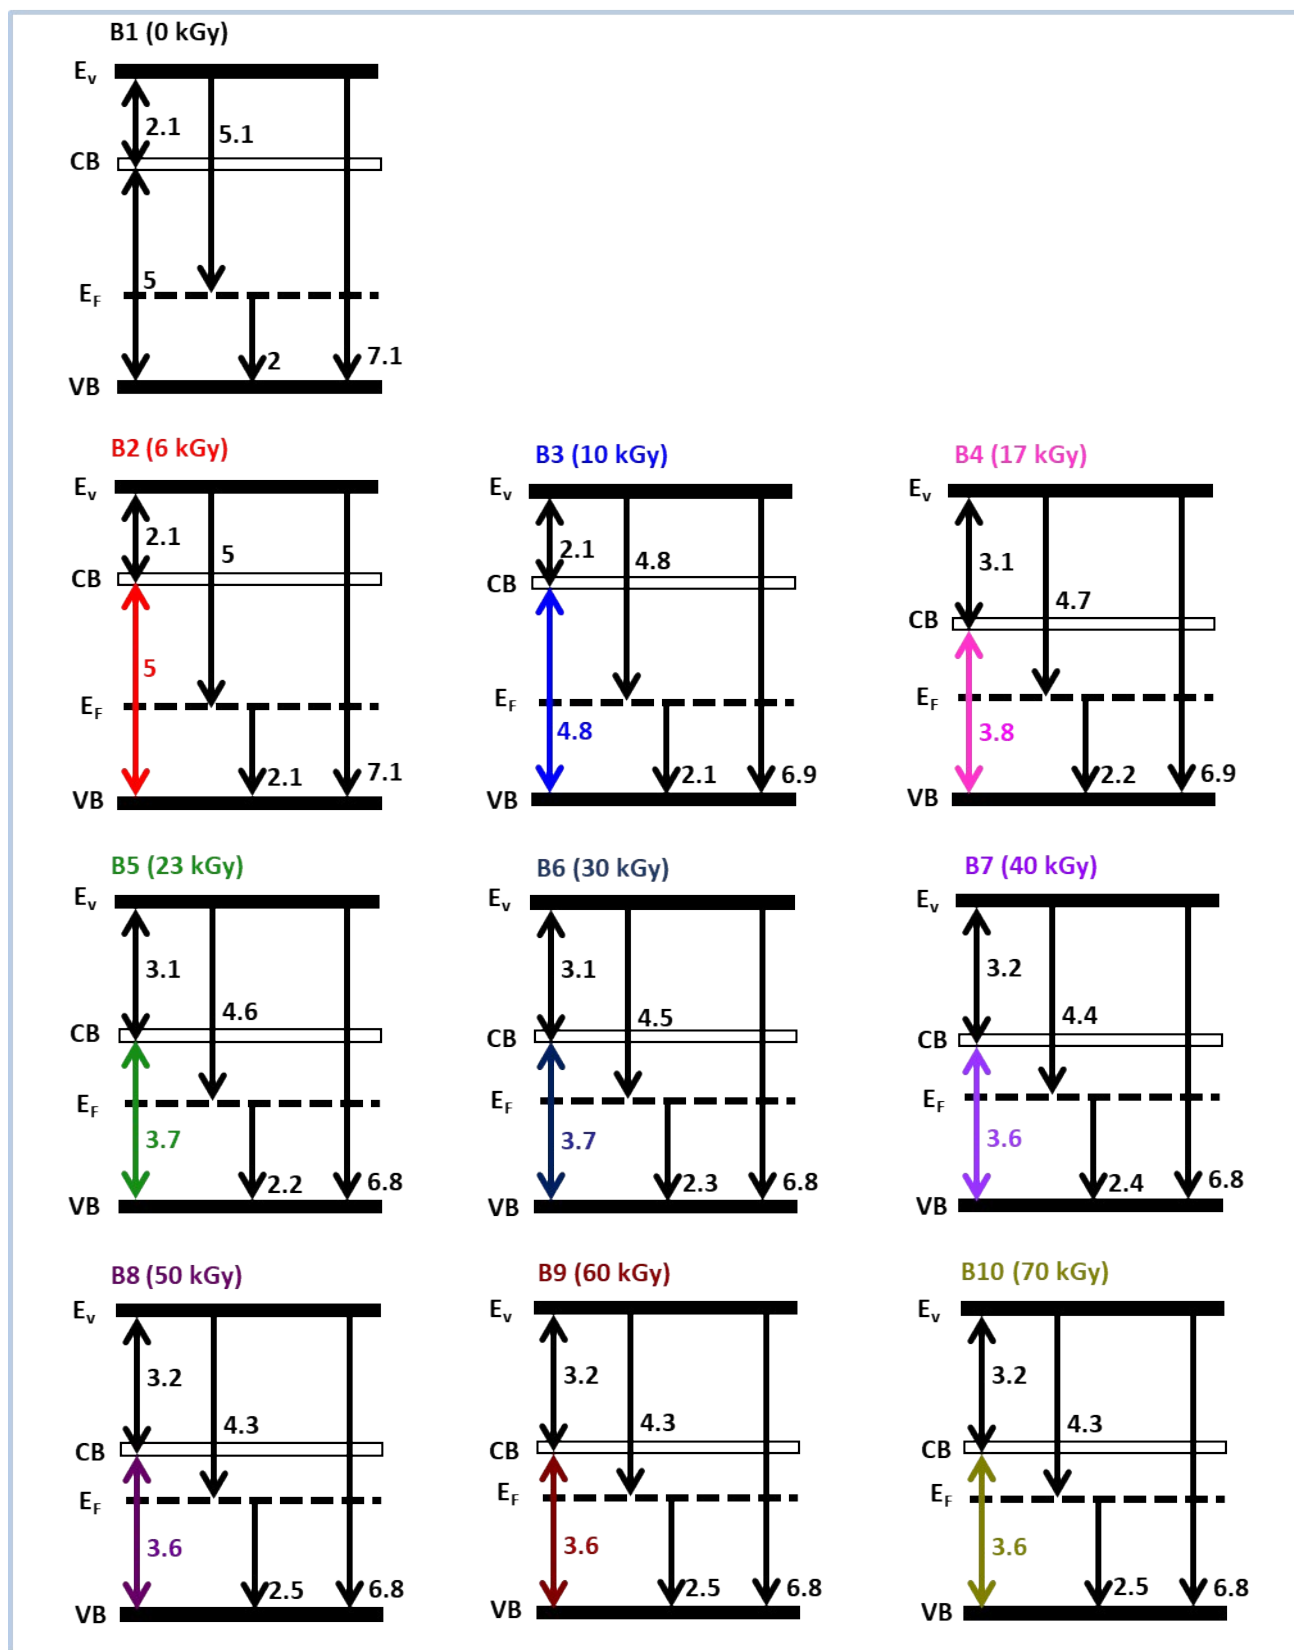

Fig. S6 Band diagrams illustrating the evolution of the band structure of GO (0.2 g L<sup>-1</sup>)-Ag<sup>+</sup> (10<sup>-2</sup> mol L<sup>-1</sup>) in the presence of isopropanol (0.2 mol L<sup>-1</sup>) as a function of absorbed dose (Series B).

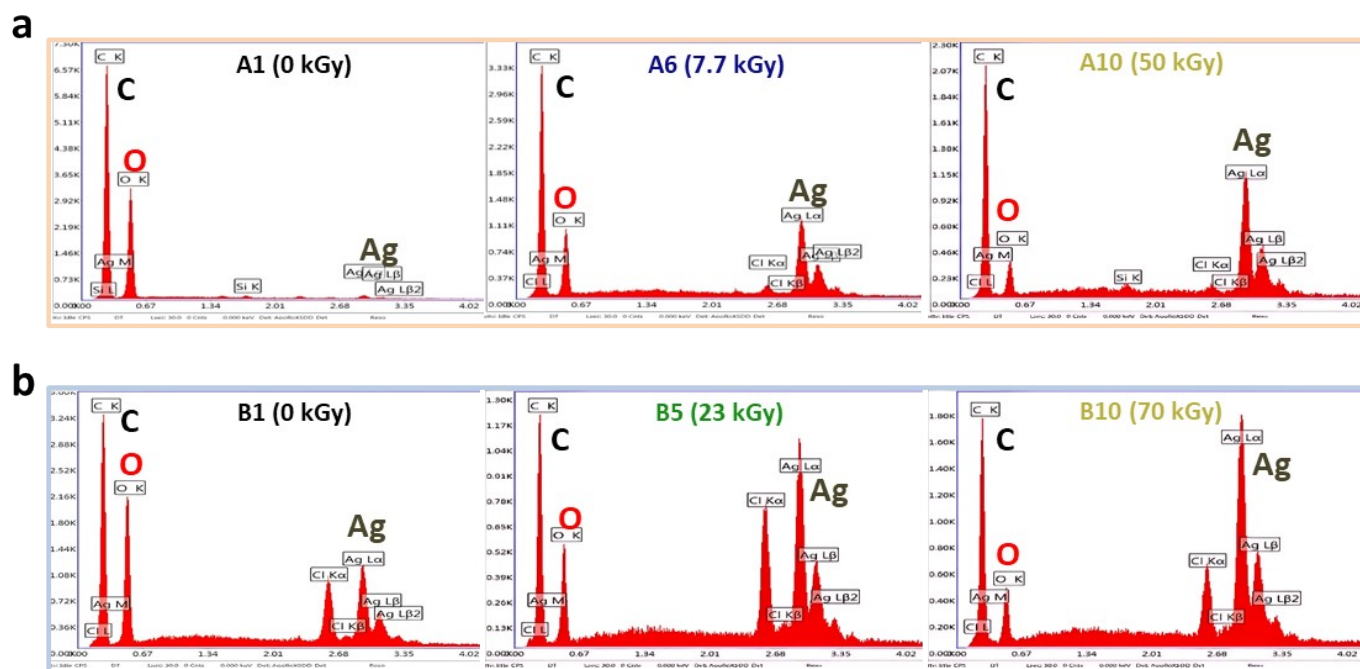

**Fig. S7** EDX diagrams of samples containing GO and Ag<sup>+</sup> before and after irradiation at increasing absorbed doses: a) Series A ([OG] = 0.2 g L<sup>-1</sup>, [IPA] = 0.2 mol L<sup>-1</sup>, [Ag<sup>+</sup>] = 10<sup>-2</sup> mol L<sup>-1</sup>); (b) Series B ([OG] = 0.2 g L<sup>-1</sup>, [IPA] = 0.2 mol L<sup>-1</sup>, [Ag<sup>+</sup>] = 10<sup>-2</sup> mol L<sup>-1</sup>).



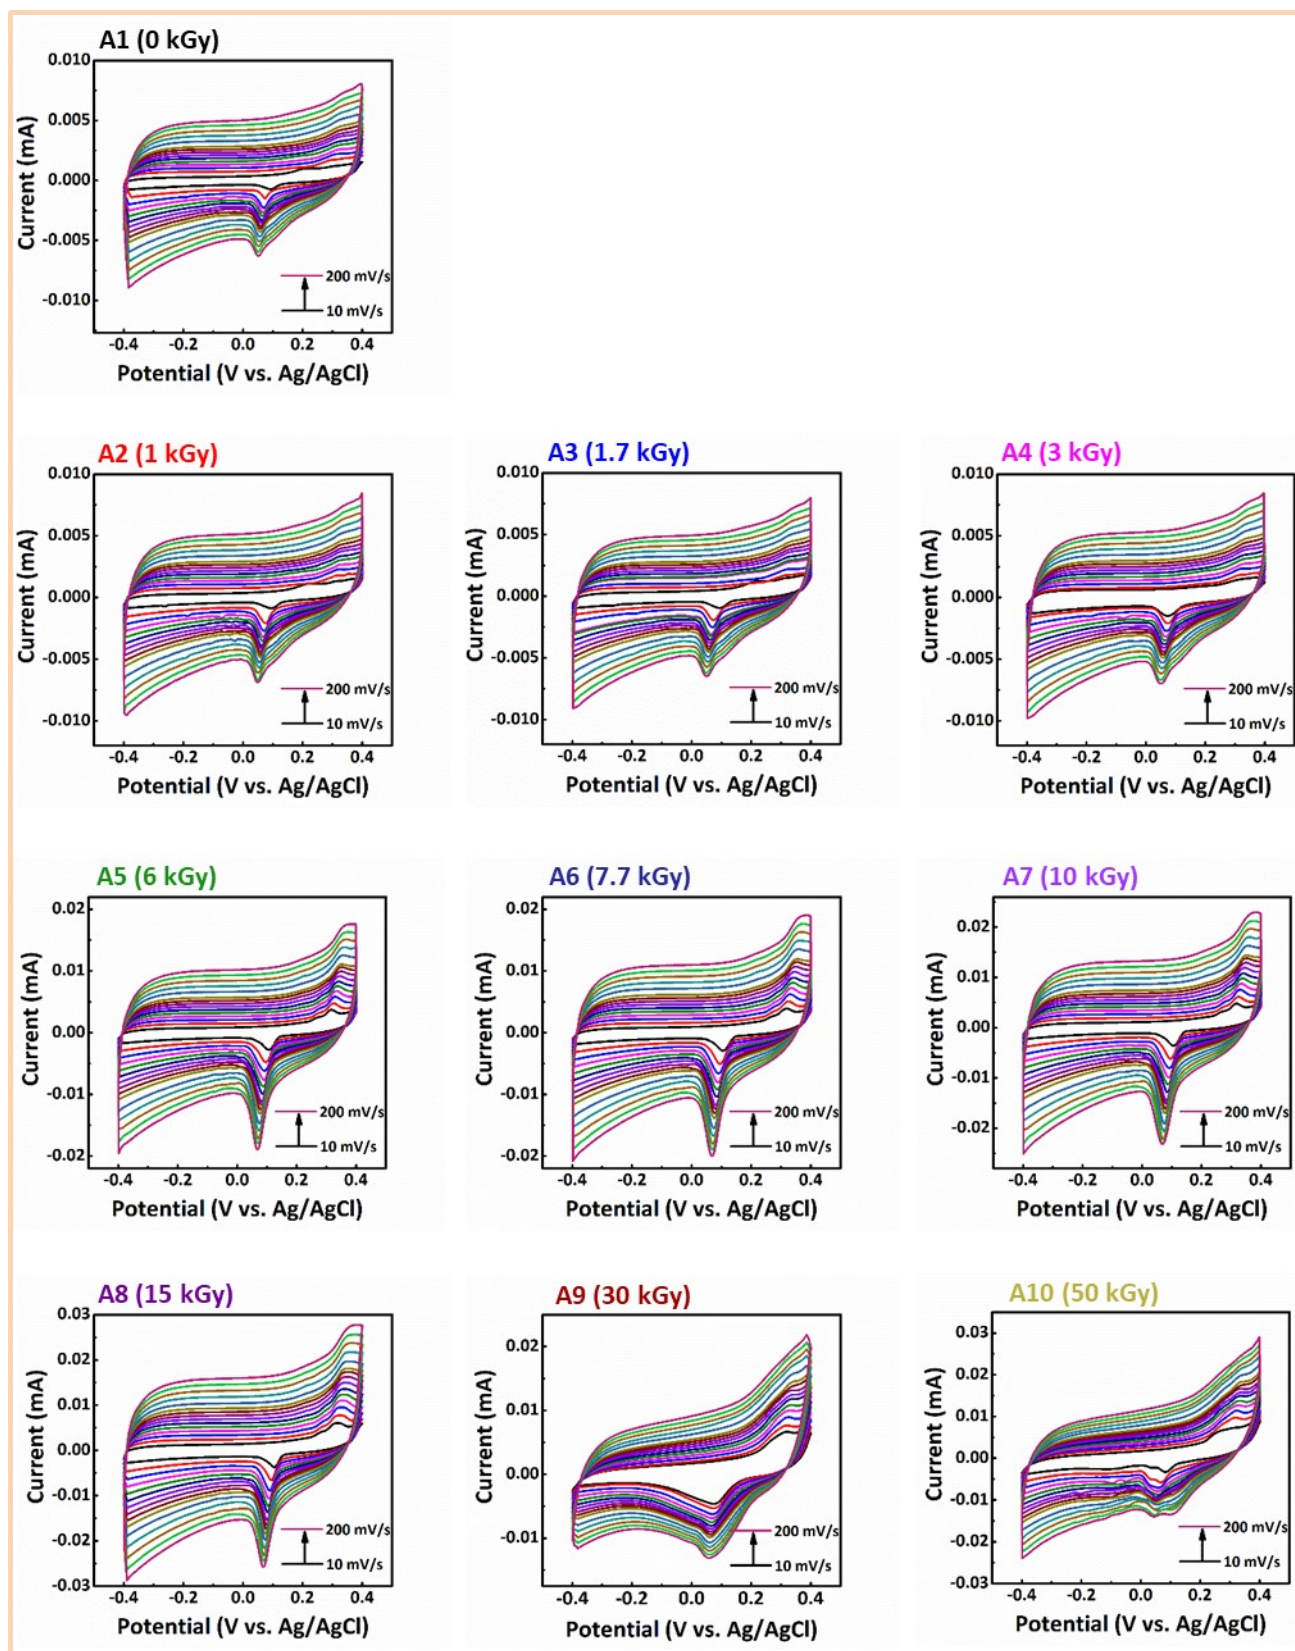

Fig. S8 Cyclic voltammograms at different scan rates (10–200  $\text{mV s}^{-1}$ ) in 0.1 M KOH electrolyte for non-irradiated and irradiated GO-Ag<sup>+</sup> at different doses (Series A, [OG] = 0.2  $\text{g L}^{-1}$ , [IPA] = 0.2  $\text{mol L}^{-1}$ , [Ag<sup>+</sup>] =  $10^{-3}$   $\text{mol L}^{-1}$ ).

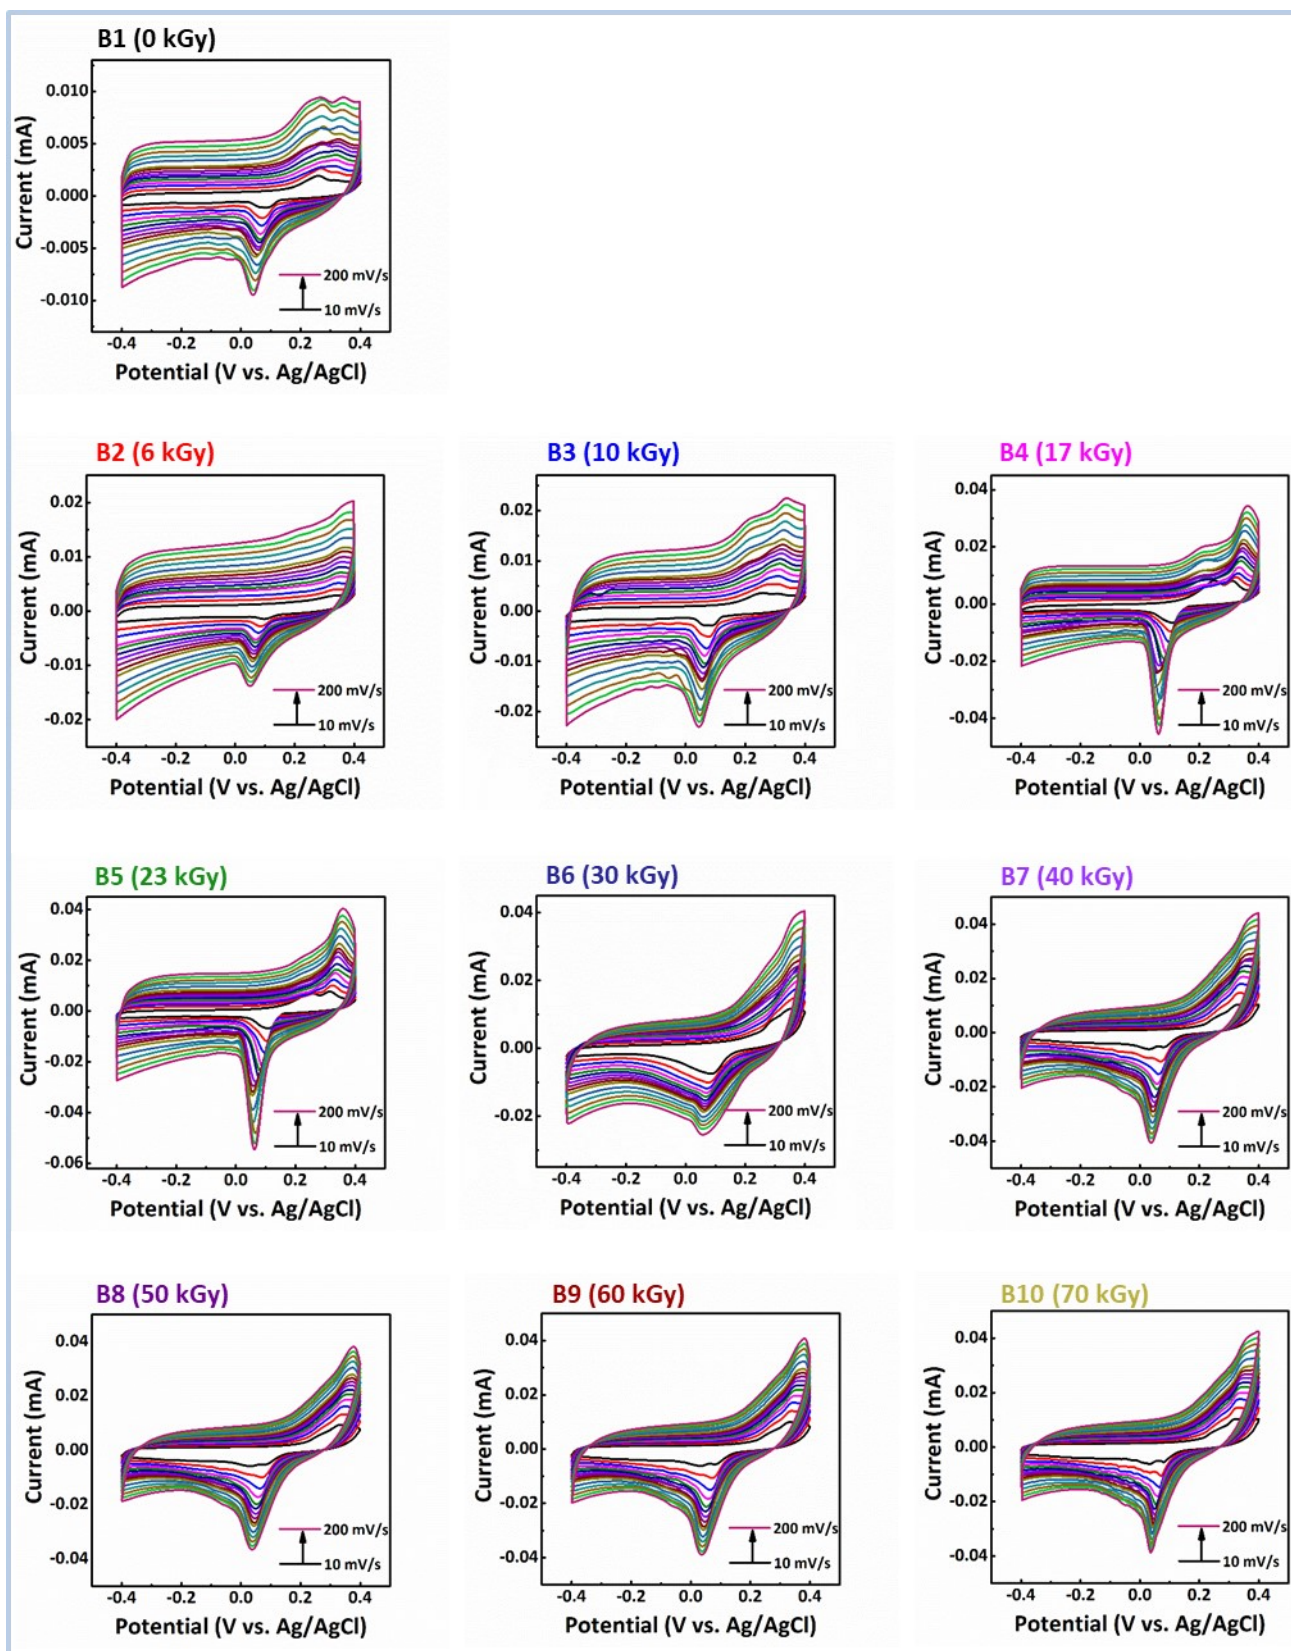

Fig. S9 Cyclic voltammograms at different scan rates (10-200  $\text{mV s}^{-1}$ ) in 0.1 M KOH electrolyte for non-irradiated and irradiated GO- $\text{Ag}^+$  at different doses (SeriesB,  $[\text{OG}] = 0.2 \text{ g L}^{-1}$ ,  $[\text{IPA}] = 0.2 \text{ mol L}^{-1}$ ,  $[\text{Ag}^+] = 10^{-2} \text{ mol L}^{-1}$ ).
